# Supplementary material
Source: PubMed Central journal article supplement (PMC2820188)
Supplement: mmc1.pdf [file mmc1.pdf]

## Mutations in *TSPAN12* Cause Autosomal-Dominant

### Familial Exudative Vitreoretinopathy

James A. Poulter, Manir Ali, David F. Gilmour, Aine Rice, Hiroyuki Kondo, Kenshi Hayashi, David A. Mackey, Lisa S. Kearns, Jonathan B. Ruddle, Jamie E. Craig, Eric A. Pierce, Louise M. Downey, Moin D. Mohamed, Alexander F. Markham, Chris F. Inglehearn, and Carmel Toomes

Figure S1. Pedigrees of FEVR Families and Additional Clinical Information

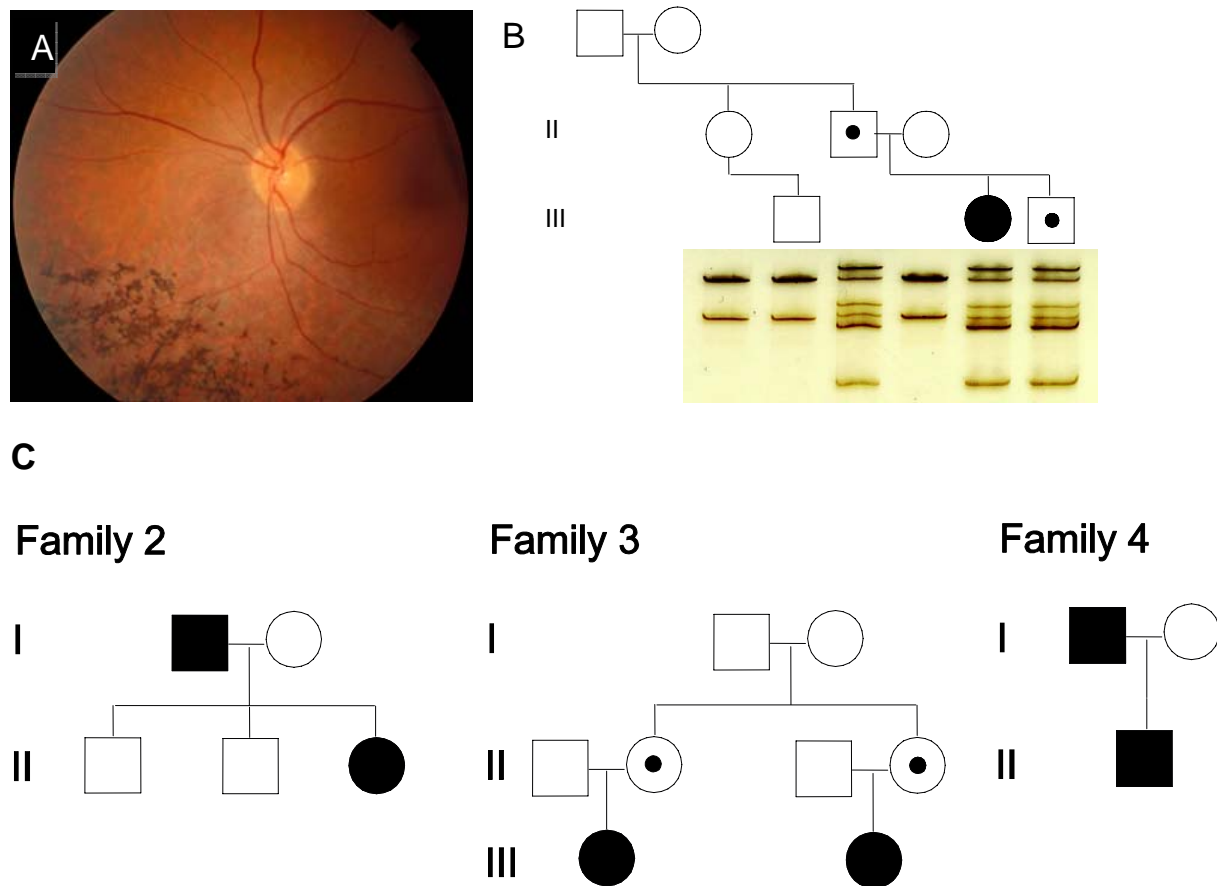

A, Unusual fundus appearance seen in both eyes of individual II:2 from Family 1 who carries a *TSPAN12* mutation. Fundus photograph shows localised bone spicule pigmentation, reminiscent in appearance to that seen in retinitis pigmentosa. B, Mutation segregating with FEVR in Family 1. Unaffected individuals (unblackened); affected individuals (blackened); individuals asymptomatic

for FEVR (blackened circle in square). Segregation illustrated by SSCP trace of exon 4. C, Pedigrees of FEVR families reported in this study.

**Table S1. *TSPAN12* Primers**

| Exon | Primer sequences (5'-3')       | Size (bp) |
|------|--------------------------------|-----------|
| 2    | F: ATGTCCCGTGTTCCTCTCTCC       | 382       |
|      | R: CCAGGGGTGGATTTCTTTGT        |           |
| 3    | F: TGGTAATTGGGAAAGATATTATGTAAC | 291       |
|      | R: CCAAAGATCAAGGAAGAGCA        |           |
| 4    | F: TGAGGCATCATGATTGAAAGAA      | 346       |
|      | R: GCTATCACTGCTCCCTAATCTTGT    |           |
| 5    | F: GGTCCCCTTTCTTGGAGAAC        | 947       |
|      | R: TGGAAATGTGCTTTAGACACA5GA    |           |
| 6    | F: GTACAAAATACCTCTTCATTTATCACA | 529       |
|      | R: GAAGAAAAGCAGGCCATGAA        |           |
| 7    | F: TGATGACAGATATAGCTCTGGGT     | 376       |
|      | R: TTTTAAGGCCTTTTACATTTAGACA   |           |
| 8    | F: GCTTCCCTGAGAACCACTG         | 605       |
|      | R: CCATCCTCATTTTAAAGCATAGA     |           |
